# Supplementary material for: Contextual Support for Less Salient Homophones and Pun Humor Appreciation: Evidence From Eye Movements in Reading Chinese Homophone Puns
Source: Front Psychol. 2022 May 11;13:875479. doi: 10.3389/fpsyg.2022.875479 (PMC9131095; doi:10.3389/fpsyg.2022.875479)
Supplement: Supplementary file 1 [file Table_1.XLSX]

## Sheet: Sheet1
Item	Sentence	Condition
1	上海远大男士医院，您的男题我们解决。	Homophone-pun
1	上海远大牙科医院，您的男题我们解决。	Homophone-error
1	上海远大男士医院，您的难题我们解决。	Homophone-salient
2	中意牌空调，您终生无汗的选择。	Homophone-pun
2	中意牌台灯，您终生无汗的选择。	Homophone-error
2	中意牌空调，您终生无憾的选择。	Homophone-salient
3	只有选对了内衣，才能让女性不受胸险困扰。	Homophone-pun
3	只有选对了小区，才能让女性不受胸险困扰。	Homophone-error
3	只有选对了内衣，才能让女性不受凶险困扰。	Homophone-salient
4	杭州红十字协会，我们救在您身边。	Homophone-pun
4	杭州书法家协会，我们救在您身边。	Homophone-error
4	杭州红十字协会，我们就在您身边。	Homophone-salient
5	儿童成长过程中锌元素至关重要，健康宝宝用锌照顾。	Homophone-pun
5	儿童成长过程中水安全至关重要，健康宝宝用锌照顾。	Homophone-error
5	儿童成长过程中锌元素至关重要，健康宝宝用心照顾。	Homophone-salient
6	这酒在百姓当中特别受欢迎，要论民酒非它莫属。	Homophone-pun
6	这酒在富豪当中特别受欢迎，要论民酒非它莫属。	Homophone-error
6	这酒在百姓当中特别受欢迎，要论名酒非它莫属。	Homophone-salient
7	我们邀请了著名棋手王浩，为您讲述棋中滋味。	Homophone-pun
7	我们邀请了著名歌手王浩，为您讲述棋中滋味。	Homophone-error
7	我们邀请了著名棋手王浩，为您讲述其中滋味。	Homophone-salient
8	一些明星盲目捐助，这种痴善不要也罢。	Homophone-pun
8	一些明星虚假捐助，这种痴善不要也罢。	Homophone-error
8	一些明星盲目捐助，这种慈善不要也罢。	Homophone-salient
9	开发商想把楼盘做好，先要先从小室做起。	Homophone-pun
9	开发商想把项目做好，先要先从小室做起。	Homophone-error
9	开发商想把楼盘做好，先要先从小事做起。	Homophone-salient
10	汇源牌橙汁，我们真橙爱您每一天。	Homophone-pun
10	汇源牌啤酒，我们真橙爱您每一天。	Homophone-error
10	汇源牌橙汁，我们真诚爱您每一天。	Homophone-salient
11	索菲亚牌女装，让您衣见钟情。	Homophone-pun
11	索菲亚牌钢笔，让您衣见钟情。	Homophone-error
11	索菲亚牌女装，让您一见钟情。	Homophone-salient
12	随着韩国品牌不断涌入，该国时装业面临韩流来袭。	Homophone-pun
12	随着法国品牌不断涌入，该国时装业面临韩流来袭。	Homophone-error
12	随着韩国品牌不断涌入，该国时装业面临寒流来袭。	Homophone-salient
13	中超联赛火爆，未来钱景十分看好。	Homophone-pun
13	中超联赛休战，未来钱景十分看好。	Homophone-error
13	中超联赛火爆，未来前景十分看好。	Homophone-salient
14	进一步规范资格考试，还需对证下药。	Homophone-pun
14	进一步规范课堂考试，还需对证下药。	Homophone-error
14	进一步规范资格考试，还需对症下药。	Homophone-salient
15	校园提供免费肉汤，给学生送来了胃问关怀。	Homophone-pun
15	校园提供免费单车，给学生送来了胃问关怀。	Homophone-error
15	校园提供免费肉汤，给学生送来了慰问关怀。	Homophone-salient
16	小王成天谈论女性照片，真是一个好摄之徒。	Homophone-pun
16	小王成天谈论女性身材，真是一个好摄之徒。	Homophone-error
16	小王成天谈论女性照片，真是一个好色之徒。	Homophone-salient
17	请用手机扫这里，可以码上得到红包哦。	Homophone-pun
17	请用扫帚扫这里，可以码上得到红包哦。	Homophone-error
17	请用手机扫这里，可以马上得到红包哦。	Homophone-salient
18	近期花椒价格不断上涨，有大妈戏称已有椒虑产生。	Homophone-pun
18	近期花菜价格不断上涨，有大妈戏称已有椒虑产生。	Homophone-error
18	近期花椒价格不断上涨，有大妈戏称已有焦虑产生。	Homophone-salient
19	由于受到煤炭减产的影响，一些加工厂已出现燃煤之急。	Homophone-pun
19	由于受到高粱减产的影响，一些加工厂已出现燃煤之急。	Homophone-error
19	由于受到煤炭减产的影响，一些加工厂已出现燃眉之急。	Homophone-salient
20	研究生科研若无计划，误入忙区只能瞎折腾。	Homophone-pun
20	研究生科研若无信心，误入忙区只能瞎折腾。	Homophone-error
20	研究生科研若无计划，误入盲区只能瞎折腾。	Homophone-salient
21	观众是相声演员的父母，所以我们要用最好表演笑敬观众。	Homophone-pun
21	观众是戏剧演员的父母，所以我们要用最好表演笑敬观众。	Homophone-error
21	观众是相声演员的父母，所以我们要用最好表演孝敬观众。	Homophone-salient
22	部分公司各种副总泛滥，提高企业活力减副至关重要。	Homophone-pun
22	部分公司各种培训泛滥，提高企业活力减副至关重要。	Homophone-error
22	部分公司各种副总泛滥，提高企业活力减负至关重要。	Homophone-salient
23	武汉幸福妇科医院 ，您的好孕马上就到。	Homophone-pun
23	武汉幸福骨科医院 ，您的好孕马上就到。	Homophone-error
23	武汉幸福妇科医院 ，您的好运马上就到。	Homophone-salient
24	江苏天富理财公司，选我们财能安全。	Homophone-pun
24	江苏天富水泥公司，选我们财能安全。	Homophone-error
24	江苏天富理财公司，选我们才能安全。	Homophone-salient
25	那位拉丁女星十分劲爆，跳起舞来妹力四射。	Homophone-pun
25	那位拉丁男士十分劲爆，跳起舞来妹力四射。	Homophone-error
25	那位拉丁女星十分劲爆，跳起舞来魅力四射。	Homophone-salient
26	这个月阴雨不断，真是问世间晴为何物。	Homophone-pun
26	这个月考试不断，真是问世间晴为何物。	Homophone-error
26	这个月阴雨不断，真是问世间情为何物。	Homophone-salient
27	市区动物园搬家，数千动物迁动人心。	Homophone-pun
27	市区动物园停水，数千动物迁动人心。	Homophone-error
27	市区动物园搬家，数千动物牵动人心。	Homophone-salient
28	超载渣土车常引起路面事故，不少公众对这类祸车非常反感。	Homophone-pun
28	超载渣土车常引起路面灰尘，不少公众对这类祸车非常反感。	Homophone-error
28	超载渣土车常引起路面事故，不少公众对这类货车非常反感。	Homophone-salient
29	未来三天都是高温天气，马上要烤验市政设施了。	Homophone-pun
29	未来三天都是暴雨天气，马上要烤验市政设施了。	Homophone-error
29	未来三天都是高温天气，马上要考验市政设施了。	Homophone-salient
30	这些女性司仪冬天也穿着旗袍，给观众一道美丽冻人的风景。	Homophone-pun
30	这些女性司仪冬天也穿着制服，给观众一道美丽冻人的风景。	Homophone-error
30	这些女性司仪冬天也穿着旗袍，给观众一道美丽动人的风景。	Homophone-salient
31	部分山区可发展山羊出口，通过羊财致富。	Homophone-pun
31	部分山区可发展药材出口，通过羊财致富。	Homophone-error
31	部分山区可发展山羊出口，通过洋财致富。	Homophone-salient
32	健康饮食，必须从盐把关。	Homophone-pun
32	健康作息，必须从盐把关。	Homophone-error
32	健康饮食，必须从严把关。	Homophone-salient
33	爱家牌乳胶漆，给您一个漆彩世界。	Homophone-pun
33	爱家牌霓虹灯，给您一个漆彩世界。	Homophone-error
33	爱家牌乳胶漆，给您一个七彩世界。	Homophone-salient
34	提高产品科技价值，让中国智造走向世界。	Homophone-pun
34	提高产品品牌价值，让中国智造走向世界。	Homophone-error
34	提高产品科技价值，让中国制造走向世界。	Homophone-salient
35	是不是好的相声，关键还看笑果如何。	Homophone-pun
35	是不是好的方案，关键还看笑果如何。	Homophone-error
35	是不是好的相声，关键还看效果如何。	Homophone-salient
36	公司座谈不能走过场，关键还要看聊效如何。	Homophone-pun
36	公司兼并不能走过场，关键还要看聊效如何。	Homophone-error
36	公司座谈不能走过场，关键还要看疗效如何。	Homophone-salient
37	据说她平日不爱收拾，是众多乱室佳人中的个性派。	Homophone-pun
37	据说她平日不爱打扮，是众多乱室佳人中的个性派。	Homophone-error
37	据说她平日不爱收拾，是众多乱世佳人中的个性派。	Homophone-salient
38	康美牌减肥药，我们提供更好的瘦后服务。	Homophone-pun
38	康美牌感冒药，我们提供更好的瘦后服务。	Homophone-error
38	康美牌减肥药，我们提供更好的售后服务。	Homophone-salient
39	图书馆这么早就放退场音乐，真是太赶人了吧。	Homophone-pun
39	图书馆这么早就放流行音乐，真是太赶人了吧。	Homophone-error
39	图书馆这么早就放退场音乐，真是太感人了吧。	Homophone-salient
40	迅捷牌摩托，给您骑乐无穷的享受。	Homophone-pun
40	迅捷牌电脑，给您骑乐无穷的享受。	Homophone-error
40	迅捷牌摩托，给您其乐无穷的享受。	Homophone-salient
41	天冷时在车上放一个保温杯，这样可以有杯无患哦。	Homophone-pun
41	天冷时在车上放一个防滑链，这样可以有杯无患哦。	Homophone-error
41	天冷时在车上放一个保温杯，这样可以有备无患哦。	Homophone-salient
42	贵人鞋业，与您同心鞋力成就辉煌。	Homophone-pun
42	贵人糖业，与您同心鞋力成就辉煌。	Homophone-error
42	贵人鞋业，与您同心协力成就辉煌。	Homophone-salient
43	本店炸鸡全部八折，请勿失良鸡赶紧购买哦。	Homophone-pun
43	本店商品全部八折，请勿失良鸡赶紧购买哦。	Homophone-error
43	本店炸鸡全部八折，请勿失良机赶紧购买哦。	Homophone-salient
44	老师检查背课文，他笑到“今天我可是有背而来哦”。	Homophone-pun
44	老师检查俯卧撑，他笑到“今天我可是有背而来哦”。	Homophone-error
44	老师检查背课文，他笑到“今天我可是有备而来哦”。	Homophone-salient
45	钢铁企业大量倒闭，钢铁惨业面临新情况。	Homophone-pun
45	钢铁企业大量上市，钢铁惨业面临新情况。	Homophone-error
45	钢铁企业大量倒闭，钢铁产业面临新情况。	Homophone-salient
46	本书讲述了该国电视剧产业30年的发展，以及其间的剧变历程。	Homophone-pun
46	本书讲述了该国游乐园产业30年的发展，以及其间的剧变历程。	Homophone-error
46	本书讲述了该国电视剧产业30年的发展，以及其间的巨变历程。	Homophone-salient
47	新丽牌空调，给您的皮肤清涼一夏的感觉。	Homophone-pun
47	新丽牌碘酒，给您的皮肤清涼一夏的感觉。	Homophone-error
47	新丽牌空调，给您的皮肤清涼一下的感觉。	Homophone-salient
48	对付脸上的疙瘩，网友晒出自己的各种战痘秘诀。	Homophone-pun
48	对付脸上的细菌，网友晒出自己的各种战痘秘诀。	Homophone-error
48	对付脸上的疙瘩，网友晒出自己的各种战斗秘诀。	Homophone-salient
49	一些受访的留守老人承认，没有性福已很久。	Homophone-pun
49	一些受访的留守儿童承认，没有性福已很久。	Homophone-error
49	一些受访的留守老人承认，没有幸福已很久。	Homophone-salient
50	小红经常给男朋友炖鸡汤，闺蜜笑她离成家庭煮妇也不远了。	Homophone-pun
50	小红经常给男朋友打电话，闺蜜笑她离成家庭煮妇也不远了。	Homophone-error
50	小红经常给男朋友炖鸡汤，闺蜜笑她离成家庭主妇也不远了。	Homophone-salient
51	内阁加入好战成员，该国政府进行危调引发热议。	Homophone-pun
51	内阁加入环保成员，该国政府进行危调引发热议。	Homophone-error
51	内阁加入好战成员，该国政府进行微调引发热议。	Homophone-salient
52	农民导演用光积蓄拍电影，过程艰辛但却自造快乐。	Homophone-pun
52	农民导演用光胶片拍电影，过程艰辛但却自造快乐。	Homophone-error
52	农民导演用光积蓄拍电影，过程艰辛但却制造快乐。	Homophone-salient
53	我国银行卡全面升级，已经进入全芯时代。	Homophone-pun
53	我国铁路网全面升级，已经进入全芯时代。	Homophone-error
53	我国银行卡全面升级，已经进入全新时代。	Homophone-salient
54	不少婚宴浪费严重，服务员面对如此剩宴都不再觉得稀奇。	Homophone-pun
54	不少婚宴攀比严重，服务员面对如此剩宴都不再觉得稀奇。	Homophone-error
54	不少婚宴浪费严重，服务员面对如此盛宴都不再觉得稀奇。	Homophone-salient
55	一些年青人参加网络传销，最终劫果很不好。	Homophone-pun
55	一些年青人参加网络竞赛，最终劫果很不好。	Homophone-error
55	一些年青人参加网络传销，最终结果很不好。	Homophone-salient
56	绿叶牌精品粽子，给您与粽不同的享受。	Homophone-pun
56	绿叶牌精品雪梨，给您与粽不同的享受。	Homophone-error
56	绿叶牌精品粽子，给您与众不同的享受。	Homophone-salient
57	当时金融行业再次萧条，从业人员薪情低落。	Homophone-pun
57	当时金融行业再次分化，从业人员薪情低落。	Homophone-error
57	当时金融行业再次萧条，从业人员心情低落。	Homophone-salient
58	一些演艺厅的表演十分低俗，可被称为纯愚乐节目。	Homophone-pun
58	一些演艺厅的表演十分专业，可被称为纯愚乐节目。	Homophone-error
58	一些演艺厅的表演十分低俗，可被称为纯娱乐节目。	Homophone-salient
59	他定居上海后买了一个房子，过起了负翁的生活。	Homophone-pun
59	他定居上海后买了一个游艇，过起了负翁的生活。	Homophone-error
59	他定居上海后买了一个房子，过起了富翁的生活。	Homophone-salient
60	那边有一个流氓，像是馋上路过的一个小姑娘了。	Homophone-pun
60	那边有一个乞丐，像是馋上路过的一个小姑娘了。	Homophone-error
60	那边有一个流氓，像是缠上路过的一个小姑娘了。	Homophone-salient
61	几个小孩子向公厕里扔石头，结果激起了公粪还上了新闻。	Homophone-pun
61	几个小孩子向公园里扔石头，结果激起了公粪还上了新闻。	Homophone-error
61	几个小孩子向公厕里扔石头，结果激起了公愤还上了新闻。	Homophone-salient
62	那个模特签名时还要带上手套，真是过于保手的一个人。	Homophone-pun
62	那个模特签名时还要带上眼镜，真是过于保手的一个人。	Homophone-error
62	那个模特签名时还要带上手套，真是过于保守的一个人。	Homophone-salient
63	老李存了一年私房钱才买了那种白酒，真是好酒的等待啊。	Homophone-pun
63	老李存了一年私房钱才买了那种鱼竿，真是好酒的等待啊。	Homophone-error
63	老李存了一年私房钱才买了那种白酒，真是好久的等待啊。	Homophone-salient
64	小明只吃那家店的薯条，正所谓心有所薯不二家啊。	Homophone-pun
64	小明只吃那家店的面条，正所谓心有所薯不二家啊。	Homophone-error
64	小明只吃那家店的薯条，正所谓心有所属不二家啊。	Homophone-salient
65	小王上班被倒下的锅炉砸伤了，真是倒煤到家了。	Homophone-pun
65	小王上班被倒下的水管砸伤了，真是倒煤到家了。	Homophone-error
65	小王上班被倒下的锅炉砸伤了，真是倒眉到家了。	Homophone-salient
66	作家小刘一直坚持待在家中创作，不愧是坐家一族啊。	Homophone-pun
66	作家小刘一直坚持待在野外创作，不愧是坐家一族啊。	Homophone-error
66	作家小刘一直坚持待在家中创作，不愧是作家一族啊。	Homophone-salient
67	那个妻管严停电时还要给老婆扇扇子，真是妻凉的男人。	Homophone-pun
67	那个妻管严停电时还要给老婆洗衣服，真是妻凉的男人。	Homophone-error
67	那个妻管严停电时还要给老婆扇扇子，真是凄凉的男人。	Homophone-salient
68	那家店卖的蒸笼才用一个月就破了，太不蒸气了吧。	Homophone-pun
68	那家店卖的书包才用一个月就破了，太不蒸气了吧。	Homophone-error
68	那家店卖的蒸笼才用一个月就破了，太不争气了吧。	Homophone-salient
69	那个卖布的居然不带尺子，明显是个居心不量的奸商。	Homophone-pun
69	那个卖布的居然不带零钱，明显是个居心不量的奸商。	Homophone-error
69	那个卖布的居然不带尺子，明显是个居心不良的奸商。	Homophone-salient
70	村妇一气之下把自种的苦瓜全倒河里了，这是河苦了呀。	Homophone-pun
70	村妇一气之下把自种的西瓜全倒河里了，这是河苦了呀。	Homophone-error
70	村妇一气之下把自种的苦瓜全倒河里了，这是何苦了呀。	Homophone-salient
71	小偷把金条藏到了粪池里面，但警察还是将这些脏物全部找到。	Homophone-pun
71	小偷把金条藏到了冰箱里面，但警察还是将这些脏物全部找到。	Homophone-error
71	小偷把金条藏到了粪池里面，但警察还是将这些赃物全部找到。	Homophone-salient
72	他被皇上斥责到，“你的声音真是朕耳欲聋啊” 。	Homophone-pun
72	他被同事斥责到，“你的声音真是朕耳欲聋啊” 。	Homophone-error
72	他被皇上斥责到，“你的声音真是震耳欲聋啊” 。	Homophone-salient
